# Supplementary material for: Prevalence of Hydrocephalus Among Children Under Five Admitted to Edna Adan Hospital, Hargeisa, Somaliland: A Five-year Retrospective Study
Source: Research Square preprint supplement (doi:10.21203/rs.3.rs-7448110/v1), 2025-09-18
Supplement: Supplementary file 1 [file f7ebe35483def276067ae4fd.docx]

| R | Age | Age categorized | Gender | Gender categorized | Year admitted | Cause of Hydrocephalus | Cause of HC categorized |
| --- | --- | --- | --- | --- | --- | --- | --- |
| 1 | 7 months | 1 | M | 1 | 2020 | Congenital | 1 |
| 2 | 18 days | 1 | M | 1 | 2020 | Congenital | 1 |
| 3 | 22 days | 1 | M | 1 | 2020 | Congenital | 1 |
| 4 | 3 months | 1 | F | 2 | 2020 | Unspecific | 5 |
| 5 | 3 months | 1 | F | 2 | 2020 | Congenital | 1 |
| 6 | 10 months | 1 | F | 2 | 2020 | Congenital | 1 |
| 7 | 2 months | 1 | F | 2 | 2020 | Non communicating | 4 |
| 8 | 9 months | 1 | F | 2 | 2020 | Unspecific | 5 |
| 9 | 12 months | 1 | F | 2 | 2020 | Congenital | 1 |
| 10 | 9 months | 1 | F | 2 | 2020 | Congenital | 1 |
| 11 | 18 months | 2 | F | 2 | 2020 | Congenital | 1 |
| 12 | 7 months | 1 | F | 2 | 2020 | Congenital | 1 |
| 13 | 4 years | 3 | F | 2 | 2020 | Unspecific | 5 |
| 14 | 4 months | 1 | M | 1 | 2020 | Congenital | 1 |
| 15 | 14 months | 2 | M | 1 | 2020 | Acquired | 2 |
| 16 | 40 days | 1 | M | 1 | 2020 | Congenital | 1 |
| 17 | 5 months | 1 | M | 1 | 2020 | Congenital | 1 |
| 18 | 4 months | 1 | M | 1 | 2020 | Congenital | 1 |
| 19 | 6 months | 1 | F | 2 | 2020 | Unspecific | 5 |
| 20 | 6 months | 1 | F | 2 | 2020 | Congenital | 1 |
| 21 | 3 years | 2 | F | 2 | 2020 | Congenital | 1 |
| 22 | 20 days | 1 | F | 2 | 2020 | Congenital | 1 |
| 23 | 3 months | 1 | F | 2 | 2020 | Acquired | 2 |
| 24 | 6 months | 1 | M | 1 | 2020 | Congenital | 1 |
| 25 | 38 days | 1 | M | 1 | 2020 | Unspecific | 5 |
| 26 | 4 months | 1 | M | 1 | 2020 | Congenital | 1 |
| 27 | 3 days | 1 | M | 1 | 2020 | Congenital | 1 |
| 28 | 6 weeks | 1 | F | 2 | 2020 | Congenital | 1 |
| 29 | 5 months | 1 | M | 1 | 2020 | Unspecific | 5 |
| 30 | 5 months | 1 | F | 2 | 2020 | Congenital | 1 |
| 31 | 5 months | 1 | M | 1 | 2020 | Acquired | 2 |
| 32 | 10 days | 1 | M | 1 | 2020 | Congenital | 1 |
| 33 | 9 months | 1 | F | 2 | 2020 | Congenital | 1 |
| 34 | 2 months | 1 | M | 1 | 2020 | Congenital | 1 |
| 35 | 5 months | 1 | M | 1 | 2020 | Congenital | 1 |
| 36 | 13 days | 1 | M | 1 | 2020 | Unspecific | 5 |
| 37 | 2 years | 2 | M | 1 | 2020 | Unspecific | 5 |
| 38 | 36 days | 1 | F | 2 | 2020 | Communicating | 3 |
| 39 | 5 years | 3 | F | 2 | 2020 | Congenital | 1 |
| 40 | 8 days | 1 | F | 2 | 2020 | Congenital | 1 |
| 41 | 4 days | 1 | M | 1 | 2020 | Congenital | 1 |
| 42 | 1 month | 1 | F | 2 | 2020 | Congenital | 1 |
| 43 | 2 months | 1 | F | 2 | 2020 | Acquired | 2 |
| 44 | 3 months | 1 | F | 2 | 2020 | Congenital | 1 |
| 45 | 20 days | 1 | M | 1 | 2020 | Congenital | 1 |
| 46 | 9 months | 1 | F | 2 | 2020 | Acquired | 2 |
| 47 | 3 months | 1 | M | 1 | 2020 | Congenital | 1 |
| 48 | 6 months | 1 | M | 1 | 2020 | Congenital | 1 |
| 49 | 3 months | 1 | F | 2 | 2020 | Acquired | 2 |
| 50 | 5 months | 1 | M | 1 | 2020 | Congenital | 1 |
| 51 | 6 weeks | 1 | F | 2 | 2020 | Unspecific | 5 |
| 52 | 9 months | 1 | M | 1 | 2020 | Congenital | 1 |
| 53 | 13 days | 1 | F | 2 | 2020 | Congenital | 1 |
| 54 | 3 years | 2 | F | 2 | 2020 | Congenital | 1 |
| 55 | 4 years | 3 | F | 2 | 2020 | Congenital | 1 |
| 56 | 11 months | 1 | M | 1 | 2020 | Unspecific | 5 |
| 57 | 9 months | 1 | M | 1 | 2020 | Acquired | 2 |
| 58 | 2 months | 1 | M | 1 | 2020 | Congenital | 1 |
| 59 | 3 months | 1 | F | 2 | 2020 | Congenital | 1 |
| 60 | 4 years | 3 | F | 2 | 2020 | Acquired | 2 |
| 61 | 2 years | 2 | F | 2 | 2020 | Unspecific | 5 |
| 62 | 2 months | 1 | F | 2 | 2020 | Congenital | 1 |
| 63 | 18 days | 1 | M | 1 | 2020 | Congenital | 1 |
| 64 | 3 months | 1 | F | 2 | 2020 | Congenital | 1 |
| 65 | 3 months | 1 | M | 1 | 2020 | Congenital | 1 |
| 66 | 24 days | 1 | M | 1 | 2020 | Unspecific | 5 |
| 67 | 8 days | 1 | F | 2 | 2020 | Congenital | 1 |
| 68 | 6 days | 1 | M | 1 | 2020 | Congenital | 1 |
| 69 | 12 months | 1 | F | 2 | 2020 | Congenital | 1 |
| 70 | 8 months | 1 | F | 2 | 2020 | Unspecific | 5 |
| 71 | 11 days | 1 | M | 1 | 2020 | Communicating | 3 |
| 72 | 3 years | 2 | F | 2 | 2020 | Congenital | 1 |
| 73 | 2 months | 1 | M | 1 | 2021 | Unspecific | 5 |
| 74 | 15 days | 1 | M | 1 | 2021 | Congenital | 1 |
| 75 | 25 days | 1 | M | 1 | 2021 | Congenital | 1 |
| 76 | 6 weeks | 1 | F | 2 | 2021 | Acquired | 2 |
| 77 | 2 months | 1 | F | 2 | 2021 | Congenital | 1 |
| 78 | 6 weeks | 1 | F | 2 | 2021 | Unspecific | 5 |
| 79 | 4 months | 1 | M | 1 | 2021 | Congenital | 1 |
| 80 | 6 months | 1 | M | 1 | 2021 | Congenital | 1 |
| 81 | 6 months | 1 | F | 2 | 2021 | Congenital | 1 |
| 82 | 4 months | 1 | F | 2 | 2021 | Acquired | 2 |
| 83 | 25 days | 1 | F | 2 | 2021 | Unspecific | 5 |
| 84 | 9 months | 1 | F | 2 | 2021 | Congenital | 1 |
| 85 | 2 months | 1 | F | 2 | 2021 | Congenital | 1 |
| 86 | 6 months | 1 | M | 1 | 2021 | Congenital | 1 |
| 87 | 7 months | 1 | M | 1 | 2021 | Congenital | 1 |
| 88 | 6 months | 1 | M | 1 | 2021 | Congenital | 1 |
| 89 | 4 months | 1 | M | 1 | 2021 | Congenital | 1 |
| 90 | 12 months | 1 | F | 2 | 2021 | Acquired | 2 |
| 91 | 8 months | 1 | F | 2 | 2021 | Unspecific | 5 |
| 92 | 2 months | 1 | M | 1 | 2021 | Congenital | 1 |
| 93 | 9 days | 1 | F | 2 | 2021 | Congenital | 1 |
| 94 | 4 months | 1 | M | 1 | 2021 | Congenital | 1 |
| 95 | 6 weeks | 1 | M | 1 | 2021 | Acquired | 2 |
| 96 | 8 months | 1 | F | 2 | 2021 | Congenital | 1 |
| 97 | 12 months | 1 | M | 1 | 2021 | Congenital | 1 |
| 98 | 2 months | 1 | M | 1 | 2021 | Congenital | 1 |
| 99 | 9 months | 1 | F | 2 | 2021 | Congenital | 1 |
| 100 | 9 months | 1 | M | 1 | 2021 | Unspecific | 5 |
| 101 | 4 months | 1 | F | 2 | 2021 | Congenital | 1 |
| 102 | 4 months | 1 | M | 1 | 2021 | Acquired | 2 |
| 103 | 4 months | 1 | M | 1 | 2021 | Communicating | 3 |
| 104 | 6 months | 1 | M | 1 | 2021 | Unspecific | 5 |
| 105 | 23 days | 1 | F | 2 | 2021 | Congenital | 1 |
| 106 | 2 months | 1 | F | 2 | 2021 | Acquired | 2 |
| 107 | 1 month | 1 | M | 1 | 2021 | Congenital | 1 |
| 108 | 1 month | 1 | M | 1 | 2021 | Congenital | 1 |
| 109 | 4 months | 1 | F | 2 | 2021 | Congenital | 1 |
| 110 | 4 months | 1 | F | 2 | 2021 | Unspecific | 5 |
| 111 | 18 days | 1 | F | 2 | 2021 | Congenital | 1 |
| 112 | 2 months | 1 | F | 2 | 2021 | Acquired | 2 |
| 113 | 8 months | 1 | M | 1 | 2021 | Unspecific | 5 |
| 114 | 4 months | 1 | M | 1 | 2021 | Congenital | 1 |
| 115 | 6 weeks | 1 | M | 1 | 2021 | Congenital | 1 |
| 116 | 1 month | 1 | M | 1 | 2021 | Congenital | 1 |
| 117 | 22 days | 1 | M | 1 | 2021 | Congenital | 1 |
| 118 | 4 months | 1 | F | 2 | 2021 | Congenital | 1 |
| 119 | 9 months | 1 | M | 1 | 2021 | Unspecific | 5 |
| 120 | 5 months | 1 | M | 1 | 2021 | Congenital | 1 |
| 121 | 3 days | 1 | M | 1 | 2021 | Congenital | 1 |
| 122 | 6 months | 1 | F | 2 | 2021 | Congenital | 1 |
| 123 | 5 months | 1 | F | 2 | 2021 | Unspecific | 5 |
| 124 | 8 months | 1 | M | 1 | 2021 | Acquired | 2 |
| 125 | 5 months | 1 | F | 2 | 2021 | Congenital | 1 |
| 126 | 30 days | 1 | F | 2 | 2021 | Congenital | 1 |
| 127 | 6 weeks | 1 | M | 1 | 2021 | Congenital | 1 |
| 128 | 43 days | 1 | M | 1 | 2021 | Unspecific | 5 |
| 129 | 22 days | 1 | M | 1 | 2021 | Congenital | 1 |
| 130 | 4 months | 1 | M | 1 | 2021 | Congenital | 1 |
| 131 | 2 months | 1 | F | 2 | 2021 | Congenital | 1 |
| 132 | 8 months | 1 | M | 1 | 2021 | Congenital | 1 |
| 133 | 20 days | 1 | F | 2 | 2022 | Unspecific | 5 |
| 134 | 12 months | 1 | M | 1 | 2022 | Congenital | 1 |
| 135 | 20 days | 1 | F | 2 | 2022 | Unspecific | 5 |
| 136 | 4 months | 1 | F | 2 | 2022 | Congenital | 1 |
| 137 | 12 months | 1 | M | 1 | 2022 | Acquired | 2 |
| 138 | 32 days | 1 | F | 2 | 2022 | Congenital | 1 |
| 139 | 4 months | 1 | F | 2 | 2022 | Congenital | 1 |
| 140 | 8 months | 1 | M | 1 | 2022 | Unspecific | 5 |
| 141 | 12 days | 1 | M | 1 | 2022 | Congenital | 1 |
| 142 | 6 weeks | 1 | M | 1 | 2022 | Congenital | 1 |
| 143 | 26 days | 1 | M | 1 | 2022 | Acquired | 2 |
| 144 | 19 days | 1 | M | 1 | 2022 | Unspecific | 5 |
| 145 | 5 months | 1 | M | 1 | 2022 | Congenital | 1 |
| 146 | 43 days | 1 | M | 1 | 2022 | Acquired | 2 |
| 147 | 13 days | 1 | M | 1 | 2022 | Congenital | 1 |
| 148 | 22 days | 1 | M | 1 | 2022 | Conginital | 1 |
| 149 | 6 months | 1 | F | 2 | 2022 | Non communicating | 4 |
| 150 | 4 months | 1 | M | 1 | 2022 | Unspecific | 5 |
| 151 | 7 days | 1 | F | 2 | 2022 | Congenital | 1 |
| 152 | 18 months | 2 | M | 1 | 2022 | Non communicating | 4 |
| 153 | 13 days | 1 | M | 1 | 2022 | Congenital | 1 |
| 154 | 16 days | 1 | M | 1 | 2022 | Congenital | 1 |
| 155 | 2 months | 1 | M | 1 | 2022 | Congenital | 1 |
| 156 | 6 weeks | 1 | M | 1 | 2022 | Congenital | 1 |
| 157 | 2 days | 1 | M | 1 | 2022 | Unspecific | 5 |
| 158 | 7 months | 1 | M | 1 | 2022 | Non communicating | 4 |
| 159 | 2 months | 1 | F | 2 | 2022 | Congenital | 1 |
| 160 | 8 months | 1 | M | 1 | 2022 | Congenital | 1 |
| 161 | 3 months | 1 | M | 1 | 2022 | Congenital | 1 |
| 162 | 2 months | 1 | M | 1 | 2022 | Unspecific | 5 |
| 163 | 3 months | 1 | F | 2 | 2022 | Congenital | 1 |
| 164 | 10 months | 1 | F | 2 | 2022 | Congenital | 1 |
| 165 | 4 months | 1 | M | 1 | 2022 | Congenital | 1 |
| 166 | 23 days | 1 | M | 1 | 2022 | Congenital | 1 |
| 167 | 10 days | 1 | M | 1 | 2022 | Unspecific | 5 |
| 168 | 10 months | 1 | F | 2 | 2022 | Congenital | 1 |
| 169 | 3 months | 1 | F | 2 | 2022 | Congenital | 1 |
| 170 | 7 months | 1 | F | 2 | 2022 | Congenital | 1 |
| 171 | 11 days | 1 | F | 2 | 2022 | Unspecific | 5 |
| 172 | 13 days | 1 | M | 1 | 2022 | Congenital | 1 |
| 173 | 14 days | 1 | F | 2 | 2022 | Acquired | 2 |
| 174 | 18 days | 1 | M | 1 | 2022 | Congenital | 1 |
| 175 | 4 months | 1 | M | 1 | 2022 | Congenital | 1 |
| 176 | 6 weeks | 1 | F | 2 | 2022 | Congenital | 1 |
| 177 | 18 weeks | 1 | M | 1 | 2022 | Congenital | 1 |
| 178 | 13 days | 1 | M | 1 | 2023 | Congenital | 1 |
| 179 | 2 years | 2 | F | 2 | 2023 | Communicating | 3 |
| 180 | 15 months | 2 | F | 2 | 2023 | Unspecific | 5 |
| 181 | 10 months | 1 | F | 2 | 2023 | Unspecific | 5 |
| 182 | 4 months | 1 | M | 1 | 2023 | Congenital | 1 |
| 183 | 13 days | 1 | F | 2 | 2023 | Conginital | 1 |
| 184 | 7 months | 1 | M | 1 | 2023 | Communicating | 3 |
| 185 | 5 months | 1 | F | 2 | 2023 | Congenital | 1 |
| 186 | 30 days | 1 | M | 1 | 2023 | Conginital | 1 |
| 187 | 6 months | 1 | M | 1 | 2023 | Unspecific | 5 |
| 188 | 7 months | 1 | F | 2 | 2023 | Conginital | 1 |
| 189 | 4 months | 1 | M | 1 | 2023 | Conginital | 1 |
| 190 | 9 months | 1 | F | 2 | 2023 | Acquired | 2 |
| 191 | 49 days | 1 | F | 2 | 2023 | Congenital | 1 |
| 192 | 6 months | 1 | M | 1 | 2023 | Congenital | 1 |
| 193 | 6 months | 1 | F | 2 | 2023 | Unspecific | 5 |
| 194 | 52 days | 1 | F | 2 | 2023 | Congenital | 1 |
| 195 | 3 months | 1 | F | 2 | 2023 | Congenital | 1 |
| 196 | 7 months | 1 | F | 2 | 2023 | Congenital | 1 |
| 197 | 2 months | 1 | F | 2 | 2023 | Congenital | 1 |
| 198 | 4 months | 1 | F | 2 | 2023 | Congenital | 1 |
| 199 | 15 days | 1 | F | 2 | 2023 | Congenital | 1 |
| 200 | 28 days | 1 | F | 2 | 2023 | Unspecific | 5 |
| 201 | 2 months | 1 | F | 2 | 2023 | Congenital | 1 |
| 202 | 2 months | 1 | M | 1 | 2023 | Conginital | 1 |
| 203 | 5 months | 1 | M | 1 | 2023 | Acquired | 2 |
| 204 | 3 months | 1 | M | 1 | 2023 | Unspecific | 5 |
| 205 | 9 months | 1 | M | 1 | 2023 | Congenital | 1 |
| 206 | 10 days | 1 | F | 2 | 2023 | Congenital | 1 |
| 207 | 16 months | 2 | M | 1 | 2023 | Congenital | 1 |
| 208 | 18 months | 2 | F | 2 | 2023 | Unspecific | 5 |
| 209 | 8 weeks | 1 | F | 2 | 2023 | Congenital | 1 |
| 210 | 10 months | 1 | F | 2 | 2023 | Congenital | 1 |
| 211 | 40 days | 1 | F | 2 | 2023 | Acquired | 2 |
| 212 | 10 months | 1 | F | 2 | 2023 | Congenital | 1 |
| 213 | 5 days | 1 | F | 2 | 2023 | Unspecific | 5 |
| 214 | 40 days | 1 | F | 2 | 2023 | Congenital | 1 |
| 215 | 10 months | 1 | M | 1 | 2023 | Congenital | 1 |
| 216 | 1 month | 1 | F | 2 | 2023 | Congenital | 1 |
| 217 | 6 months | 1 | M | 1 | 2023 | Unspecific | 5 |
| 218 | 4 months | 1 | F | 2 | 2024 | Congenital | 1 |
| 219 | 20 days | 1 | F | 2 | 2024 | Congenital | 1 |
| 220 | 1 month | 1 | M | 1 | 2024 | Congenital | 1 |
| 221 | 2 months | 1 | M | 1 | 2024 | Congenital | 1 |
| 222 | 19 days | 1 | F | 2 | 2024 | Non communicating | 4 |
| 223 | 4 months | 1 | F | 2 | 2024 | Unspecific | 5 |
| 224 | 10 days | 1 | M | 1 | 2024 | Congenital | 1 |
| 225 | 15 days | 1 | M | 1 | 2024 | Non communicating | 4 |
| 226 | 3 days | 1 | M | 1 | 2024 | Congenital | 1 |
| 227 | 70 days | 1 | M | 1 | 2024 | Unspecific | 5 |
| 228 | 6 months | 1 | F | 2 | 2024 | Non communicating | 4 |
| 229 | 5 months | 1 | F | 2 | 2024 | Non communicating | 4 |
| 230 | 3 months | 1 | F | 2 | 2024 | Unspecific | 5 |
| 231 | 10 months | 1 | M | 1 | 2024 | Congenital | 1 |
| 232 | 5 months | 1 | F | 2 | 2024 | Congenital | 1 |
| 233 | 12 months | 1 | F | 2 | 2024 | Congenital | 1 |
| 234 | 15 days | 1 | M | 1 | 2024 | Congenital | 1 |
| 235 | 3 months | 1 | F | 2 | 2024 | Congenital | 1 |
| 236 | 7 months | 1 | F | 2 | 2024 | Unspecific | 5 |
| 237 | 4 months | 1 | F | 2 | 2024 | Communicating | 3 |
| 238 | 4 months | 1 | M | 1 | 2024 | Congenital | 1 |
| 239 | 10 days | 1 | F | 2 | 2024 | Congenital | 1 |
| 240 | 5 months | 1 | F | 2 | 2024 | Congenital | 1 |
| 241 | 5 days | 1 | M | 1 | 2024 | Unspecific | 5 |
| 242 | 7 months | 1 | M | 1 | 2024 | Non communicating | 4 |
| 243 | 3 years | 2 | F | 2 | 2024 | Non communicating | 4 |
| 244 | 11 days | 1 | M | 1 | 2024 | Congenital | 1 |
| 245 | 1 month | 1 | M | 1 | 2024 | Congenital | 1 |
| 246 | 4 months | 1 | F | 2 | 2024 | Non communicating | 4 |
| 247 | 1 month | 1 | F | 2 | 2024 | Congenital | 1 |
| 248 | 5 years | 3 | M | 1 | 2024 | Acquired | 2 |
| 249 | 4 years | 3 | F | 2 | 2024 | Unspecific | 5 |
| 250 | 3 years | 2 | M | 1 | 2024 | Acquired | 2 |
| 251 | 5 years | 3 | M | 1 | 2024 | Acquired | 2 |
| 252 | 26 days | 1 | M | 1 | 2024 | Non communicating | 4 |
| 253 | 7 months | 1 | M | 1 | 2024 | Congenital | 1 |
| 254 | 3 days | 1 | M | 1 | 2024 | Congenital | 1 |
| 255 | 22 days | 1 | F | 2 | 2024 | Unspecific | 5 |
| 256 | 6 weeks | 1 | F | 2 | 2024 | Congenital | 1 |
| 257 | 30 days | 1 | F | 2 | 2024 | Congenital | 1 |
| 258 | 5 months | 1 | F | 2 | 2024 | Acquired | 2 |
| 259 | 30 days | 1 | F | 2 | 2024 | Unspecific | 5 |
| 260 | 2 months | 1 | M | 1 | 2024 | Acquired | 2 |
| 261 | 25 days | 1 | M | 1 | 2024 | Acquired | 2 |
| 262 | 7 days | 1 | F | 2 | 2024 | Congenital | 1 |
| 263 | 80 days | 1 | F | 2 | 2024 | Acquired | 2 |
| 264 | 5 years | 3 | F | 2 | 2024 | Acquired | 2 |
| 265 | 6 months | 1 | M | 1 | 2024 | Acquired | 2 |
| 266 | 4 years | 3 | F | 2 | 2024 | Acquired | 2 |
